# Supplementary material
Source: MDPI journal article supplement (https://www.mdpi.com/2036-7481/15/2/50)
Supplement: s1 [file s1]

# Exploring the Antimicrobial and Antioxidant Activities of *Streptomyces* sp. EIZ2 Isolated from Moroccan Agricultural Soil

## SUMMARY

|                                                                                                                                            |          |
|--------------------------------------------------------------------------------------------------------------------------------------------|----------|
| <b>1. General methods.....</b>                                                                                                             | <b>1</b> |
| <b>2. Supplementary figures</b>                                                                                                            |          |
| Figure S1. GC-MS spectra of 5 important secondary metabolites present in ethyl acetate extract of EIZ2 strain.....                         | 2        |
| Figure S2. Macroscopic Appearance of Actinobacteria isolates (EIZ1, EIZ2, EIZ3, and EIZ45) .....                                           | 3        |
| <b>3. Supplementary tables</b>                                                                                                             |          |
| Supplementary Table 1. Resistance profile of multi-drug resistant (MDR) clinical bacteria.....                                             | 4        |
| Supplementary Table 2. Molecular identification of the selected EIZ2 <i>Actinobacteria</i> isolate based on 16S rRNA gene sequencing ..... | 5        |
| References.....                                                                                                                            | 6        |

## **1. General methods**

### **1.1 Recommended media for *Actinobacteria* isolation**

M2: 10 g of starch, 0.3 g of casein, 2 g of KNO<sub>3</sub>, 2 g of NaCl, 0.05 g of MgSO<sub>4</sub>·7H<sub>2</sub>O, 2 g of K<sub>2</sub>HPO<sub>4</sub>, 0.02 g of CaCO<sub>3</sub>, 0.01 g of FeSO<sub>4</sub>·7H<sub>2</sub>O, 1 g of glucose, 15 g of agar, 1L distilled water, and pH adjusted at 7.2 [1].

GA: 10 g of Glucose, 0.5 g of asparagine, 0.5 g of K<sub>2</sub>HPO<sub>4</sub>, 15 g of agar, 1L distilled water, and pH adjusted at 6 [1].

GLM: 10 g of glucose, 3 g of yeast extract, 3 g of malate extract, 5 g of tryptone, 15 g of agar, 1L distilled water, and pH adjusted at 7.2 [2,3].

Bennett : 10 g of glucose, 2 g of yeast extract, 1 g of meat extract, 2 g of tryptone, 15 g of agar, 1L distilled water, and pH adjusted at 7.2 [4].

### **1.2 Recommended media for testing antimicrobial activity [5]**

ISP1: 3 g of yeast extract, 5 g of tryptone, 16 g of agar, 1L of distilled water, and pH adjusted at 7.15.

ISP2: 4 g of yeast extract, 4 g of glucose, 10 g of malate extract, 16 g of agar, 1L of distilled water, and pH adjusted at 6.51.

GYES: 10 g of yeast extract, 10 g of glucose, 16 g of agar, 1L of distilled water, and pH adjusted at 6.96.

Bennett: 10 g of glucose, 2 g of yeast extract, 1 g of meat extract, 2 g of tryptone, 15 g of agar, 1L distilled water, and pH adjusted at 7.2.

### **1.3 Recommended medium for testing NaCl tolerance**

YEA medium: 3 g of yeast extract, 5 g of peptone, 15 g of agar, 1L of distilled water, and pH adjusted at 7.2.

### **1.4 Recommended medium for the production of melanoid pigment**

ISP9: 2.64 g of (NH<sub>2</sub>) SO<sub>4</sub>, 2.38 g of KH<sub>2</sub>PO<sub>4</sub>, 5.65 g of K<sub>2</sub>HPO<sub>4</sub>, 1 g of MgSO<sub>4</sub>·7H<sub>2</sub>O, 20 g of agar, and 1L of distilled water.

100 mL salt solution: 4 g of CuSO<sub>4</sub>·5H<sub>2</sub>O, 1.1 g of FeSO<sub>4</sub>·7H<sub>2</sub>O, 7.9 g of MnCl<sub>2</sub>·4H<sub>2</sub>O, 1.5 g of ZnSO<sub>4</sub>·7H<sub>2</sub>O.

GYES: 10 g of yeast extract, 10 g of glucose, 16 g of agar, 1L of distilled water, and pH adjusted at 6.96.

### **1.5 Other media used in this study**

PDA medium: 4 g of potato extract 20 g of glucose, 15 g of agar, 1L distilled water, and pH adjusted at 7.5.

Muller Hinton Agar medium: Ready to use

CLED medium: Ready to use.

## 2. Supplementary figures

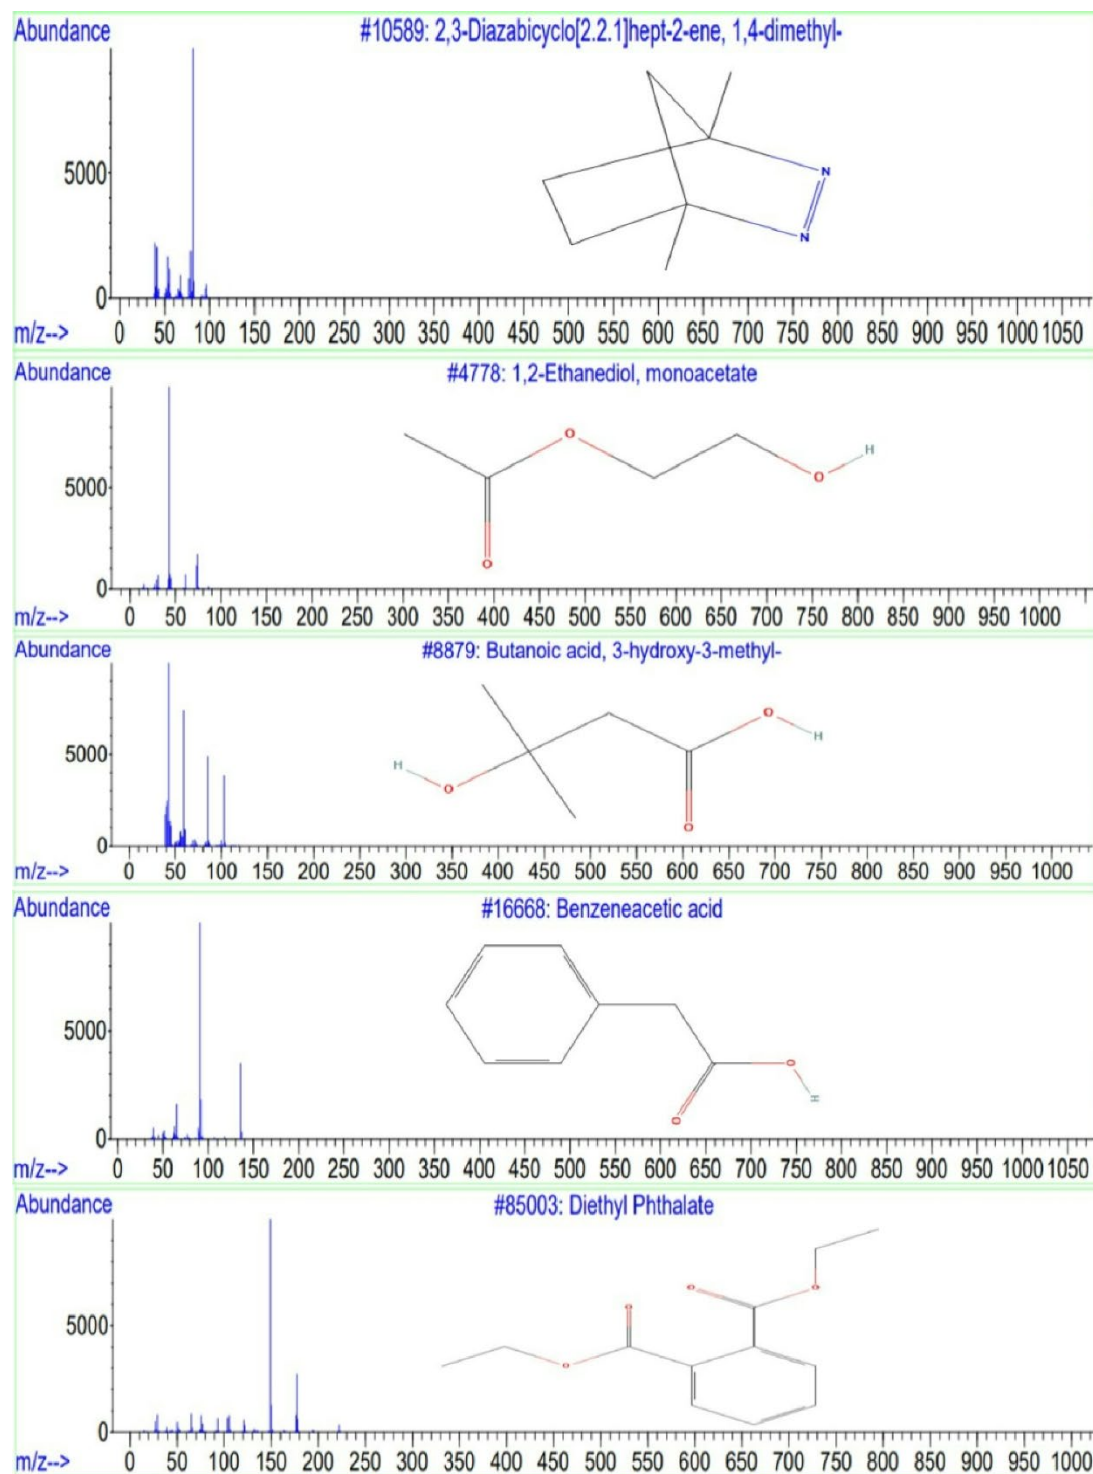

**Supplementary Figure S1.** GC-MS spectra of 5 important secondary metabolites present in ethyl acetate extract of EIZ2 strain.

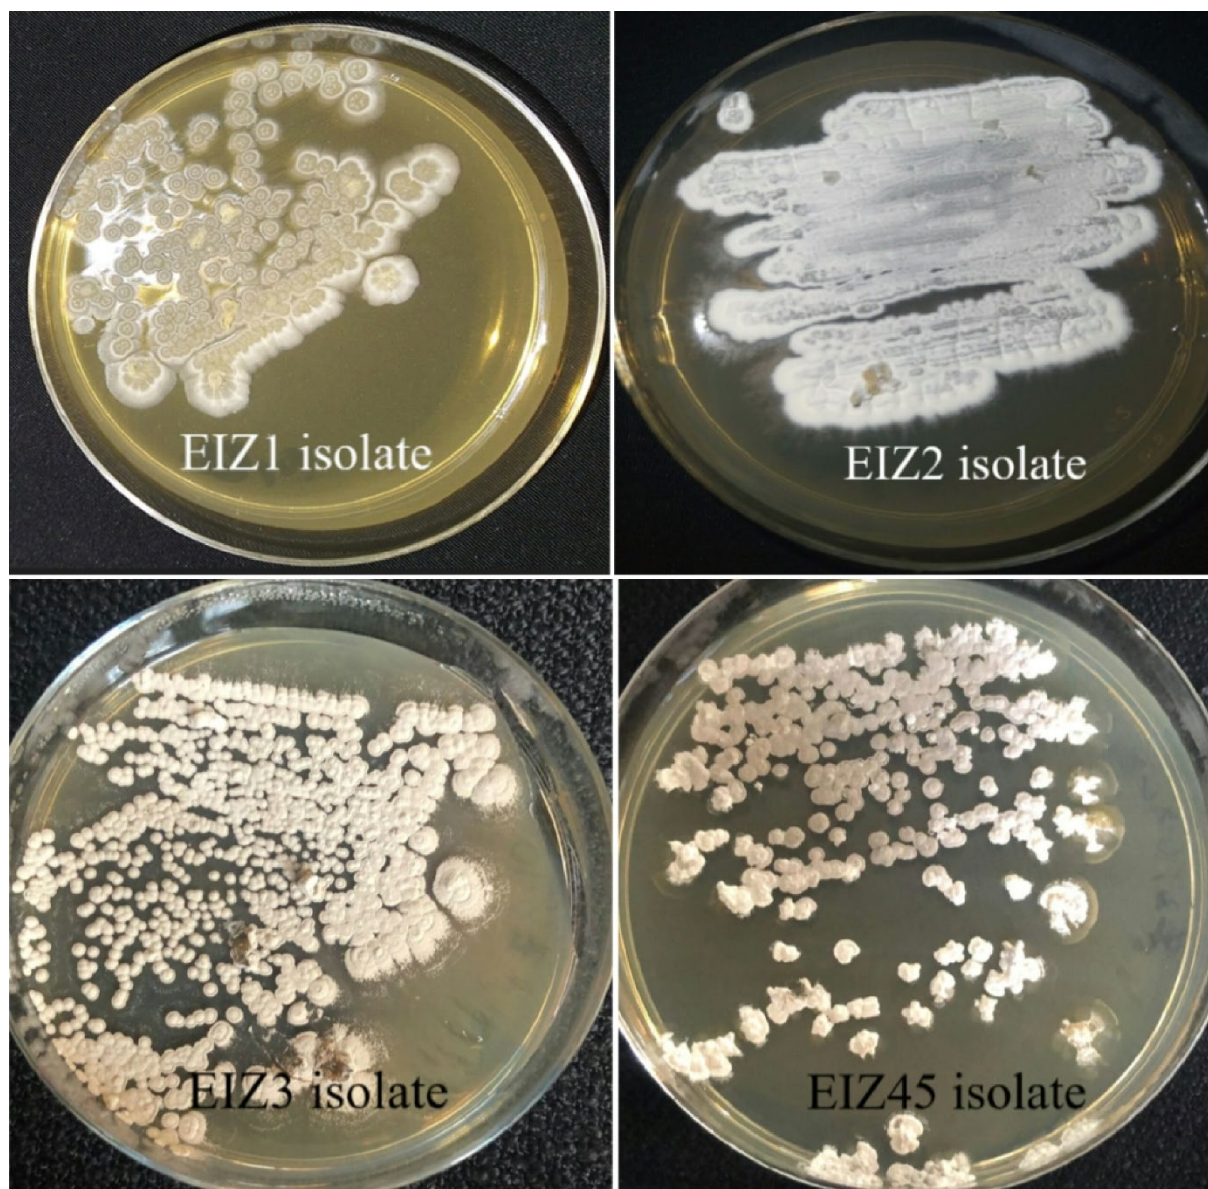

**Supplementary Figure S2.** Macroscopic Appearance of *Actinobacteria* isolates (EIZ1, EIZ2, EIZ3, and EIZ45).

### 3. Supplementary tables

**Supplementary Table S1.** Resistance profile of multi-drug resistant (MDR) clinical bacteria.

| Test strains MDR                              | Resistance to                                                           | Sensitivity to    | Intermediate to |
|-----------------------------------------------|-------------------------------------------------------------------------|-------------------|-----------------|
| Clinical <i>Klebsiella pneumoniae</i> 19K 929 | P, AMP, AML, KF, CXM, CRO, CIP, FMQ, OFX, E,<br>TE, SXT, F              | AN, CN, IPM       | AMC, NA         |
| <i>Proteus vulgaris</i> 16C1737               | P, AMP, AML, AMC, CXM, CTX, SXT, FD, F                                  | CN, CRO, OFX,     | CIP, AK         |
| Clinical <i>Klebsiella pneumoniae</i> 20B1572 | P, AMP, AML, AMC, KF, CXM, CRO, CN, CIP, NA,<br>FMQ, OFX, E, TE, SXT, F | AN, IPM           | -               |
| Clinical <i>Proteus</i> sp. 19K1313           | P, AMP, AML, KF, CXM, CIP, NA, FMQ, OFX, E,<br>TE, SXT, F               | AMC, CRO, AN, IPM | CN              |
| Clinical <i>Escherichia coli</i> 19L2418      | P, AMP, AML, AMC, KF, CXM, CRO, CN, CIP, NA,<br>FMQ, OFX, E, TE, SXT, F | AN, IPM           | -               |
|                                               |                                                                         |                   | AMC :           |

Amoxicillin + Ac. clavulanic; P: penicillin G; AMP: Ampicillin; KF: Cefalotin; CRO: Ceftriaxone; AN: Amikacin; CN: Gentamicin; CIP: Ciprofloxacin; NA: Nalidixic acid; FMQ: Flumequine; OFX: Ofloxacin; E: Erythromycin; TE: Tetracycline SXT: Trimethoprim+Sulfamide; FD: Fusidic acid; F: Nitrofurantne; CXM: Cefuroxime; VA: Vaomycin; CTX: Cefotaxime. IPM: Imipenem; CAZ: Ceftazidim; TM: Tobramycin; FOX: Cefoxitin; TIC: Ticarcillin.

**Supplementary Table S2.** Molecular identification of the selected EIZ2 *Actinobacteria* isolate based on 16S rRNA gene sequencing.

| <b>Isolate Name</b> | <b>Query Length (bp)</b> | <b>Nearest known species<sup>a</sup></b>                                 | <b>Percent identity (%)</b> | <b>Identification<sup>b</sup> (Scientific Name)</b> | <b>NCBI GenBank accession number</b> |
|---------------------|--------------------------|--------------------------------------------------------------------------|-----------------------------|-----------------------------------------------------|--------------------------------------|
| EIZ2                | 1332                     | <i>Streptomyces bacillaris</i> (T)<br>strain NBRC 13487<br>(NR 041146.1) | 99.06                       | <i>Streptomyces bacillaris</i>                      | OR 731196                            |

<sup>a</sup>NCBI's nucleotide BLAST program was used to find the closest match against the non-redundant reference RNA sequence database (refseq\_rna). The strain number, strain type (T), and GenBank accession number are all listed after the species name.

<sup>b</sup>Isolates with a greater percentage of identity than 98.78% and only one closest match for the same identity characteristics are classified up to the species level.

## References

1. Bouaziz, S.; Messis, A.; Bettache, A.; El Hadj, M.D.O.; Benallaoua, E.S. Antifungal Activity of *Streptomyces* sp. 14 Strain Isolated from Ouargla (Southeast of Algeria): Identification, Production and Characterization of the Active Substance. *Int. J. Biosci* **2016**, *9*, 45–56.
2. Das, R.; Romi, W.; Das, R.; Sharma, H.K.; Thakur, D. Antimicrobial Potentiality of *Actinobacteria* Isolated from Two Microbiologically Unexplored Forest Ecosystems of Northeast India. *BMC Microbiol.* **2018**, *18*, 1–16.
3. Thakur, D.; Yadav, A.; Gogoi, B.K.; Bora, T.C. Isolation and Screening of *Streptomyces* in Soil of Protected Forest Areas from the States of Assam and Tripura, India, for Antimicrobial Metabolites. *J. Mycol. Med.* **2007**, *17*, 242–249.
4. Lee, E.J.; Hwang, K.Y.; Lee, H.-S.; Chung, N. Characterization of a New *Streptomyces* sp. A1022 as a Potential Biocontrol Agent. *J. Korean Soc. Appl. Biol. Chem.* **2011**, *54*, 488–493.
5. Badji, B.; Riba, A.; Mathieu, F.; Lebrihi, A.; Sabaou, N. Activité Antifongique d'une Souche d'*Actinomadura* d'origine Saharienne Sur Divers Champignons Pathogènes et Toxinogènes. *J. Mycol. Med.* **2005**, *15*, 211–219.
